# Supplementary material for: Metal–organic framework MIL-53(Fe): facile microwave-assisted synthesis and use as a highly active peroxidase mimetic for glucose biosensing
Source: Royal Society of Chemistry journal article supplement (doi:10.1039/c4ra15840g), 2015-01-01
Supplement: c4ra15840g1.pdf [file c4ra15840g1.pdf]

Electronic Supplementary Information

**Metal–organic framework MIL-53(Fe): Facile microwave-assisted synthesis and use as a highly active peroxidase mimetic for glucose biosensing**

Wenfei Dong,<sup>a</sup> Xidong Liu,<sup>b</sup> Wenbing Shi,<sup>c\*</sup> Yuming Huang<sup>\*a</sup>

<sup>a</sup> *Key Laboratory of Luminescent and Real-Time Analytical Chemistry, Ministry of Education; College of Chemistry and Chemical Engineering, Southwest University, Chongqing 400715, PR China.*

<sup>b</sup> *College of Materials and Chemical Engineering, Chongqing University of Arts and Sciences, Chongqing 402160, PR China*

<sup>c</sup> *Chongqing Key Laboratory of Inorganic Special Functional Materials; College of Chemistry and Chemical Engineering, Yangtze Normal University, Chongqing 408100, PR China.*

**Table S1.** Reproducibility between different batches of the as-prepared MIL-53(Fe) using the same preparation method.

| Batch No.              | 1                       | 2                       | 3                     | RSD (%) |
|------------------------|-------------------------|-------------------------|-----------------------|---------|
| Catalytic activity (%) | 99.33±1.03 <sup>a</sup> | 91.08±1.27 <sup>a</sup> | 100±0.46 <sup>a</sup> | 3.94    |

<sup>a</sup> SD for three duplicate determinations.

As can be seen from Table S1, the second batch has lower catalytic activity as compared to batch 1 and batch 3. This is probably due to their different preparation time. The materials for batch 1 and 3 were prepared on November 22<sup>th</sup> and 23<sup>th</sup>, 2014. Whereas, the material for batch 2 was prepared 20 days ago. The reproducibility test was carried out on November 24<sup>th</sup>, 2014. Hence, we speculate that after 20-day storage, the catalytic activity of the material for batch 2 would decrease.

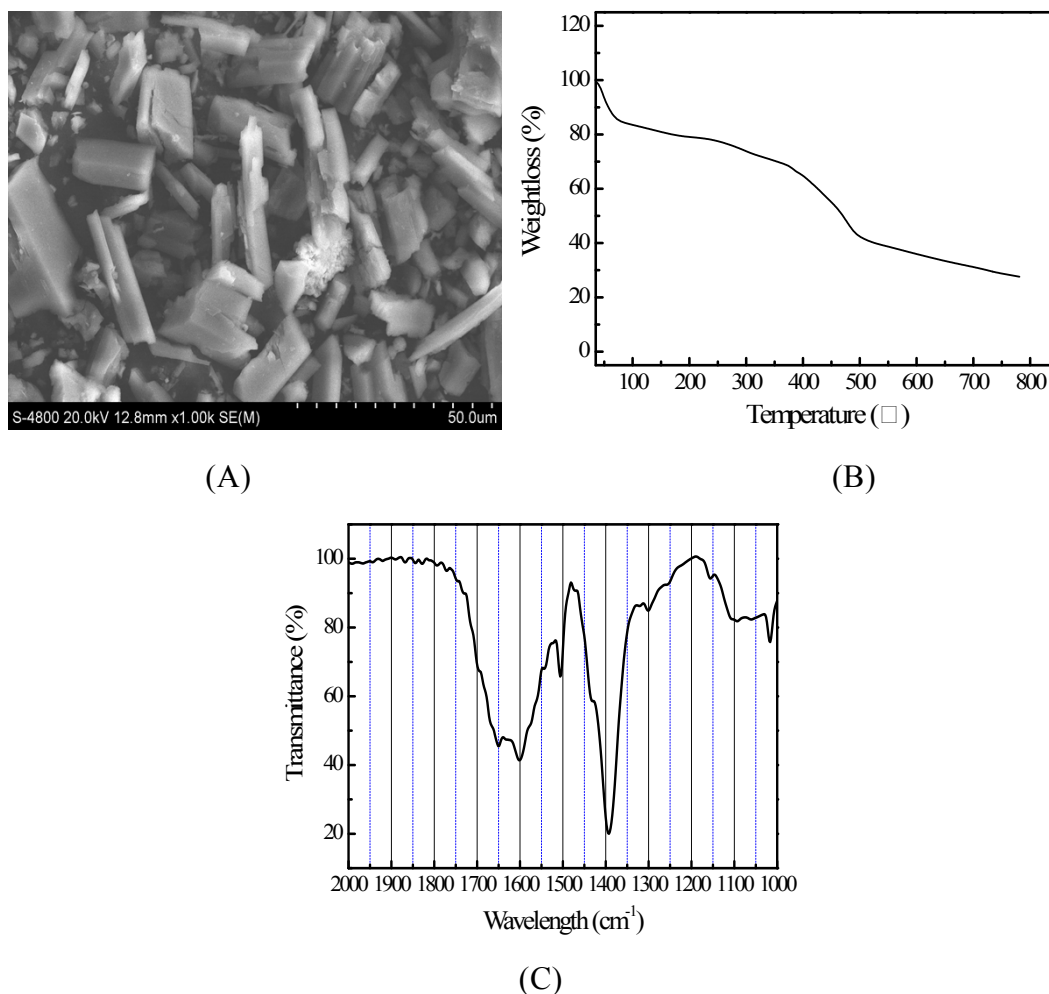

**Figure S1.** (A) SEM image of MIL-53(Fe) by CE. (B) The TG curve of the as-prepared MIL-53(Fe). (C) FT-IR spectrum of the as-prepared MIL-53(Fe).

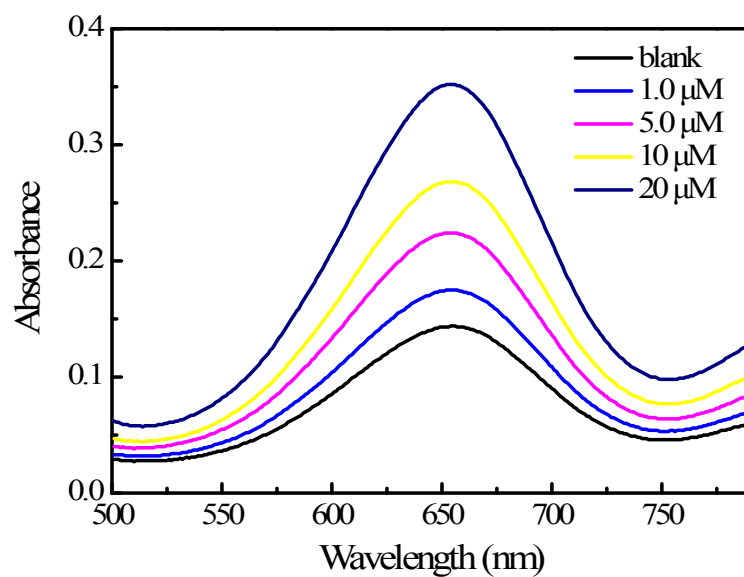

**Figure S2.** The UV-visible absorption spectra of TMB– MIL-53(Fe) system in the presence of different concentrations of  $\text{H}_2\text{O}_2$ .

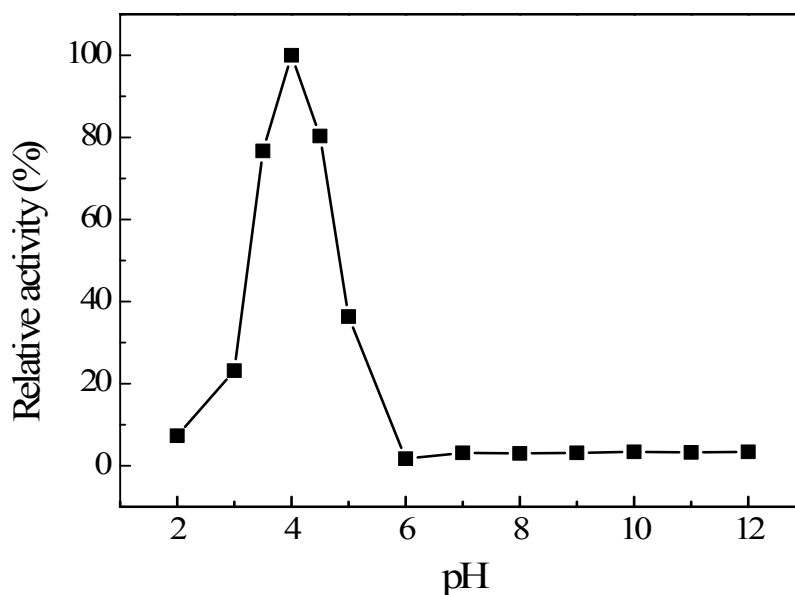

**Figure S3.** The effect of pH on the catalytic activity of the synthesized MIL-53(Fe).  
Reaction conditions: 8 mg  $\text{L}^{-1}$  MIL-53(Fe), 0.1 mM  $\text{H}_2\text{O}_2$ , 0.05 mM TMB, 0.2 M NaAc buffer, 45  $^{\circ}\text{C}$  for 20 min. The maximum point in the curve was set as 100 %.

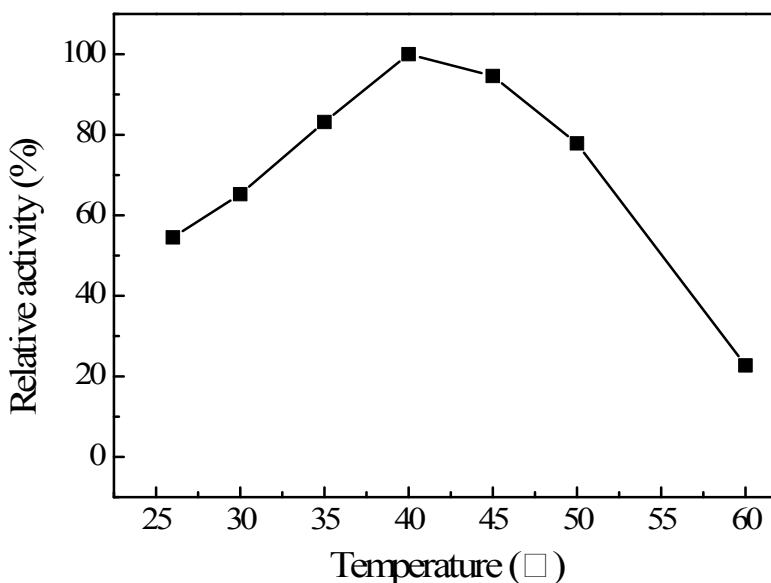

**Figure S4.** The effect temperature on the catalytic activity of the synthesized MIL-53(Fe). Reaction conditions: 8 mg L<sup>-1</sup> MIL-53(Fe), 0.1 mM H<sub>2</sub>O<sub>2</sub>, 0.05 mM TMB, 0.2 M acetate buffer (pH 4.0), 20 min reaction time. The maximum point in the curve was set as 100 %.

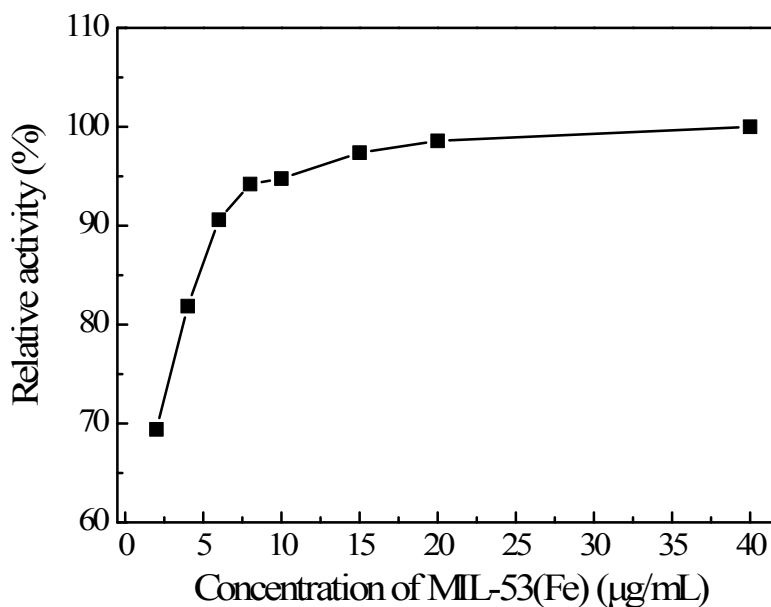

**Figure S5.** The effect of MIL-53(Fe) concentration on the catalytic activity of the synthesized MIL-53(Fe). Reaction conditions: 0.1 mM H<sub>2</sub>O<sub>2</sub>, 0.05 mM TMB, 0.2 M acetate buffer (pH 4.0), 40 °C for 20 min. The maximum point in the curve was set as 100 %.

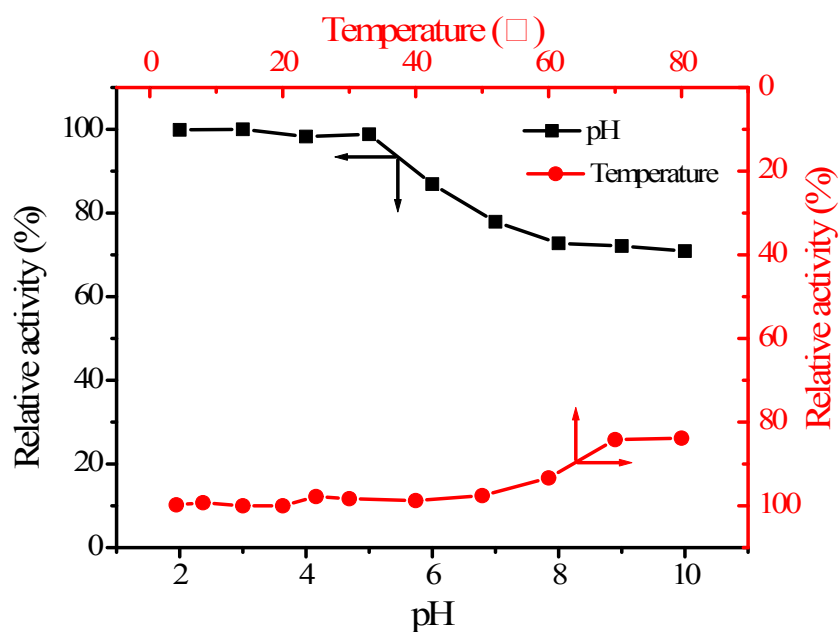

**Figure S6.** The stability of the as-prepared MIL-53(Fe) as enzyme mimic at a range of temperatures (4–80 °C) and pH (2.0–10.0). The maximum point in each curve was set as 100 %.

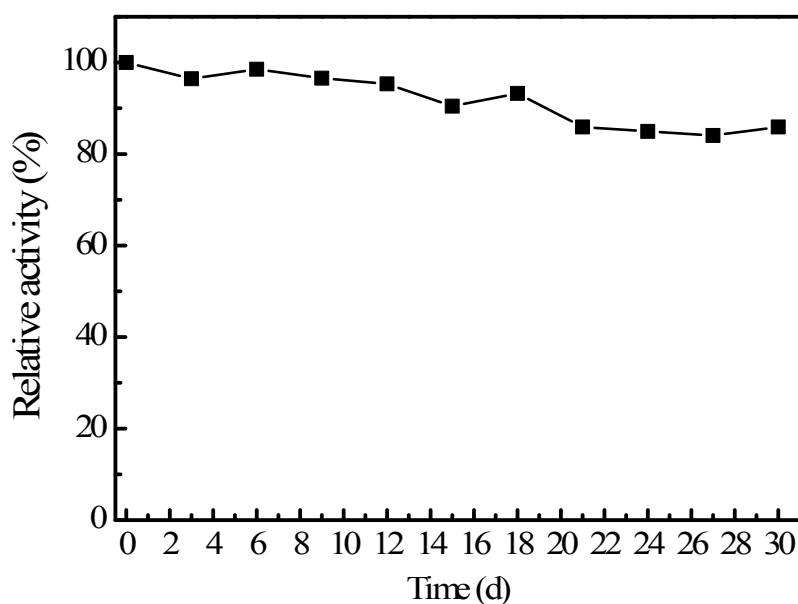

**Figure S7.** Variation of catalytic activity of the as-prepared MIL-53(Fe) with time. The maximum point in the curve was set as 100 %.

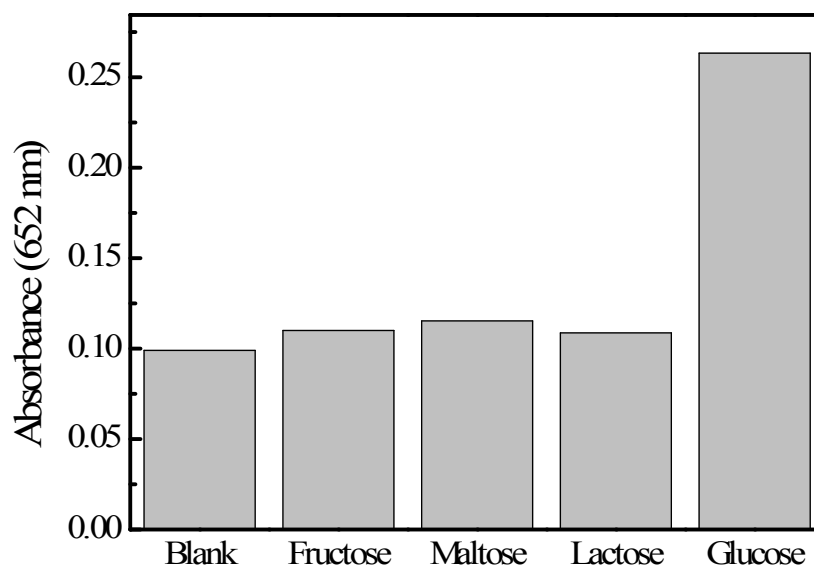

**Figure S8.** Determination of the selectivity of glucose detection was performed by 0.1 mM maltose, 0.1 mM lactose, and 0.1 mM fructose instead of 0.02 mM glucose under the same reaction conditions.
